# Supplementary material
Source: PubMed Central journal article supplement (PMC4993699)
Supplement: NIHMS782889-supplement-Supplementary_Material.pdf [file NIHMS782889-supplement-Supplementary_Material.pdf]

**Web-based Supplementary Material for “Survival Impact Index and Ultrahigh-dimensional  
Model-free Screening with Survival Outcomes”**

**Jialiang Li<sup>1,2,3\*</sup>, Qi Zheng<sup>4,\*\*</sup>, Limin Peng<sup>4,\*\*\*</sup>, and Zhipeng Huang<sup>1,3,5\*\*\*\*</sup>**

<sup>1</sup>Department of Statistics and Applied Probability, National University of Singapore, Singapore 117546, Singapore

<sup>2</sup>Duke-NUS Graduate Medical School, Singapore

<sup>3</sup>Singapore Eye Research Institute, Singapore

<sup>4</sup>Department of Biostatistics and Bioinformatics, Emory University, Atlanta, GA, 30321, U.S.A

<sup>5</sup>McDermott Center for Human Growth and Development, UT Southwestern Medical Center, Dallas, TX 75390, U.S.A

\**email*: stalj@nus.edu.sg

\*\**email*: qzheng9@emory.edu

\*\*\**email*: lpeng@emory.edu

\*\*\*\**email*: zhipeng.huang@utsouthwestern.edu

## Proofs of Corollaries

**Proof of Corollary 1:**  $1 - Pr(\mathcal{M}_* \subset \hat{\mathcal{M}}) = Pr(\exists j \in \mathcal{M}_*, \hat{\xi}_j < bn^{-\alpha}) = 1 - Pr(\exists j \in \mathcal{M}_*, |\hat{\xi}_j - \xi_j| \geq (c_0 - b)n^{-\alpha}) \leq c_3 |\mathcal{M}_*| \exp(-nc_4(c_0 - b)^2 n^{-2\alpha} - c_5 \log((c_0 - b)n^{-\alpha}))$ , which converges to 0, if  $\alpha < (1 - c)/2$  and  $p = o(\exp(n^c))$ . The sure screening property has been established.  $\square$

**Proof of Corollary 2:** Let  $\pi_n := c_3 \exp(-nc_4\nu_n^2 - c_5 \log \nu_n)$ . We have

$$\begin{aligned} p\pi_n &= c_3 \exp(-nc_4\nu_n^2 - c_5 \log \nu_n + \log p) \\ &\leq c_3 \exp\left(-nc_4 \frac{\log p + c_5 \log n/2}{c_4 n} - \frac{c_5}{2}(\log(\log p + c_5 \log n/2) - \log n - \log c_4) + \log p\right) \\ &= \frac{c_3 c_4}{(\log p + c_5 \log n/2)^{\frac{c_5}{2}}} < 1. \end{aligned}$$

Since  $\binom{p-|\mathcal{M}_*|}{k} \leq p^k$ , then we have  $Pr(|\hat{\mathcal{M}} \setminus \mathcal{M}_*| = k) \leq p^k \pi_n^k$ , which implies

$$\begin{aligned} Pr(|\hat{\mathcal{M}} \setminus \mathcal{M}_*| < n^c) &\geq 1 - \sum_{k=n^c}^p (\pi_n p)^k \\ &\geq 1 - \sum_{k=n^c}^p (c_3 \exp(-nc_4\nu_n^2 - c_5 \log \nu_n + \log p))^k \\ &\geq 1 - 2 (c_3 \exp(-nc_4\nu_n^2 - c_5 \log \nu_n + \log p))^{n^c} \\ &\geq 1 - 2c_3 p \exp(-nc_4\nu_n^2 - c_5 \log \nu_n), \end{aligned}$$

where the last inequality follows from  $p\pi_n < 1$  established above. This completes the proof of Corollary 2.  $\square$

## Lemmas

LEMMA 1: For any  $0 < \epsilon < 1$ ,

$$Pr\left(\sup_{0 \leq x \leq x_0} |\hat{S}_j(x) - S_j(x)| > \epsilon\right) \leq 12 \exp(-n\epsilon^2/9 - \log \epsilon). \quad (1)$$

**Proof:** If  $|\hat{S}_j(\eta_{k-1}^{(j)}) - S_j(\eta_{k-1}^{(j)})| < \epsilon/3$  and  $|\hat{S}_j(\eta_k^{(j)}) - S_j(\eta_k^{(j)})| < \epsilon/3$ , then for  $\eta_{k-1}^{(j)} \leq x \leq \eta_k^{(j)}$ ,

$$\hat{S}_j(x) - S_j(x) \leq \hat{S}_j(\eta_{k-1}^{(j)}) - S_j(\eta_{k-1}^{(j)}) + S_j(\eta_{k-1}^{(j)}) - S_j(x) \leq 2\epsilon/3,$$

The other direction can be shown by the same arguments. Thus, we have  $|\hat{S}_j(x) - S_j(x)| < \epsilon$

for any  $\eta_{k-1}^{(j)} \leq x \leq \eta_k^{(j)}$ . Hence, if  $\sup_{0 \leq x \leq x_0} |\hat{S}_j(x) - S_j(x)| > \epsilon$ , then for some  $0 \leq k \leq L(\epsilon)$ ,  $|\hat{S}_j(\eta_k^{(j)}) - S_j(\eta_k^{(j)})| \geq \epsilon/3$ . Thus,

$$\begin{aligned} & Pr \left( \sup_{0 \leq x \leq x_0} |\hat{S}_j(x) - S_j(x)| > \epsilon \right) \leq L(\epsilon) Pr \left( |\hat{S}_j(\eta_k^{(j)}) - S_j(\eta_k^{(j)})| > \epsilon/3 \right) \\ & \leq 2L(\epsilon) \exp \left( \frac{-1}{18} \frac{n^2 \epsilon^2}{n/4 + n\epsilon/9} \right) \leq 12 \exp(-n\epsilon^2/9 - \log \epsilon) \end{aligned}$$

where the second inequality follows from the fact  $\text{Var}[1\{X_{ji} > x\} - S_j(x)] \leq 1/4$  and Bernstein's inequality. This completes the proof of (1). Moreover, we have

$$\begin{aligned} & Pr \left( \sup_{1 \leq k \leq L(\epsilon)} |\hat{S}_j(\eta_{k-1}^{(j)}) - \hat{S}_j(\eta_k^{(j)})| > \epsilon \right) \\ & \leq Pr \left( \sup_{1 \leq k \leq L(\epsilon)} |\hat{S}_j(\eta_{k-1}^{(j)}) - S_j(\eta_{k-1}^{(j)})| + |\hat{S}_j(\eta_k^{(j)}) - S_j(\eta_k^{(j)})| > 2\epsilon/3 \right) \\ & \leq L(\epsilon) Pr \left( |\hat{S}_j(\eta_k^{(j)}) - S_j(\eta_k^{(j)})| > \epsilon/3 \right) \\ & \leq 12 \exp(-n\epsilon^2/9 - \log \epsilon). \end{aligned} \tag{2}$$

□

LEMMA 2: Given  $x \in [0, x_0]$ , for any  $24/(n\tau\gamma^4) < \epsilon < \tau/2$ , we have

$$\begin{aligned} & Pr \left( \sup_{t \in \mathcal{T}} |\hat{S}_j(t; x) - S_j(t; x)| > \epsilon \right) \\ & \leq 12 \exp(-n\epsilon^2/9 - \log \epsilon) + c_1 \exp(-n\tau\gamma^6\epsilon^2/(2c_2) - \log \epsilon). \end{aligned} \tag{3}$$

**Proof:** By Foldes and Rejto (1981), we obtain

$$Pr \left( \sup_{t \in \mathcal{T}} |\hat{S}_j(t; x) - S_j(t; x)| > \epsilon | M_{jn}(x) = k \right) \leq c_1 \exp(-k\gamma^6\epsilon^2/c_2 - \log \epsilon), \tag{4}$$

for  $12/(k\gamma^4) < \epsilon < 1$ . Here, as defined in Appendix,  $M_{jn}(x) = \sum_{i=1}^n 1\{X_{ji} > x\}$ .

If  $24/(n\tau\gamma^4) < \epsilon < \tau/2$ , then

$$\begin{aligned}
& Pr \left( \sup_{t \in \mathcal{T}} |\hat{S}_j(t; x) - S_j(t; x)| > \epsilon \right) \\
&= \sum_{k=0}^n Pr \left( \sup_{t \in \mathcal{T}} |\hat{S}_j(t; x) - S_j(t; x)| > \epsilon | M_{jn}(x) = k \right) Pr (M_{jn}(x) = k) \\
&\leq Pr (M_{jn}(x) < nS_j(x) - n\epsilon) \\
&+ \sum_{k \geq nS_j(x) - n\epsilon}^n Pr \left( \sup_{t \in \mathcal{T}} |\hat{S}_j(t; x) - S_j(t; x)| > \epsilon | M_{jn}(x) = k \right) Pr (M_{jn}(x) = k) \\
&\leq Pr \left( |\hat{S}_j(x) - S_j(x)| \geq \epsilon \right) \tag{5} \\
&\quad + \frac{c_1}{\epsilon} \exp \left( -(nS_j(x) - n\epsilon)\gamma^6 \epsilon^2 / c_2 \right) Pr (M_{jn}(x) > nS_j(x) - n\epsilon) \\
&= 12 \exp \left( -n\epsilon^2/9 - \log \epsilon \right) + c_1 \exp \left( -n\tau\gamma^6 \epsilon^2 / (2c_2) - \log \epsilon \right),
\end{aligned}$$

where the second inequality follows from (4) and the fact that for all  $k \geq nS_j(x) - n\epsilon$ ,

$$\frac{12}{k\gamma^4} \leq \frac{12}{(nS_j(x) - n\epsilon)\gamma^4} \leq \frac{24}{nS_j(x)\gamma^4} \leq \frac{24}{n\tau\gamma^4} < \epsilon,$$

and the last inequality follows from (1) and  $2\epsilon < \tau \leq S_j(x)$ . This completes the proof of Lemma

2. □

LEMMA 3: For any  $0 < \epsilon < \lambda$ ,

$$Pr \left( \sup_{(t,x) \in \mathcal{T} \times \mathcal{X}} \max_{1 \leq i \leq n} |1\{Y_i \leq t\} n \log V_{ji}(x)| > \frac{2}{\lambda - \epsilon} \right) \leq 2 \exp \left( -n\epsilon^2/4 \right). \tag{6}$$

**Proof:**

$$\begin{aligned}
& Pr \left( \sup_{(t,x) \in \mathcal{T} \times \mathcal{X}} \max_{1 \leq i \leq n} |1\{Y_i \leq t\} n \log V_{ji}(x)| > \frac{2}{\lambda - \epsilon} \right) \\
&= Pr \left( \sup_{(t,x) \in \mathcal{T} \times \mathcal{X}} \max_{1 \leq i \leq n} \left| 1\{Y_i \leq t\} n \log \left( \frac{\sum_{k=1}^n 1\{Y_k > Y_i, X_{jk} > x\}}{\sum_{k=1}^n 1\{Y_k > Y_i, X_{jk} > x\} + 1} \right) \right| > \frac{2}{\lambda - \epsilon} \right) \\
&\leq Pr \left( \sup_{(t,x) \in \mathcal{T} \times \mathcal{X}} n \left| \log \left( 1 - \frac{1}{\sum_{k=1}^n 1\{Y_k > t, X_{jk} > x\} + 1} \right) \right| > \frac{2}{\lambda - \epsilon} \right) \\
&\leq Pr \left( \sup_{(t,x) \in \mathcal{T} \times \mathcal{X}} \frac{2n}{\sum_{k=1}^n 1\{Y_k > t, X_{jk} > x\} + 1} > \frac{2}{\lambda - \epsilon} \right) \\
&\leq Pr \left( \frac{2n}{\sum_{k=1}^n 1\{Y_k > t_0, X_{jk} > x_0\} + 1} > \frac{2}{\lambda - \epsilon} \right) \\
&\leq Pr \left( \left| \frac{\sum_{l=1}^n 1\{Y_l > t_0, X_{jl} > x_0\} + 1}{2n} - \frac{\lambda}{2} \right| > \frac{\epsilon}{2} \right) \\
&\leq 2 \exp(-n\epsilon^2/4),
\end{aligned}$$

where the last inequality follow from Bernstein's inequality. This completes the proof of Lemma

3. □

LEMMA 4: Let  $\{\eta_k^{(j)}, 0 \leq k \leq L(\epsilon)\}$  be the same grid points as constructed in Lemma 1 given

$0 < \epsilon < 1$ . Then

$$\begin{aligned}
& Pr \left( \sup_{t \in \mathcal{T}, 1 \leq k \leq L(\epsilon), \eta_{k-1}^{(j)} < x < \eta_k^{(j)}} \max_{1 \leq i \leq n} n \left[ 1\{Y_i \leq t\} \log \left( \frac{V_{ji}(x)}{V_{ji}(\eta_{k-1}^{(j)})} \right) \right] > \frac{8\epsilon}{\lambda^2} \right) \\
&\leq 12 \exp(-n\epsilon^2/9 - \log \epsilon) + 2 \exp(-n\lambda^2/16). \tag{7}
\end{aligned}$$

**Proof:**

$$\begin{aligned}
& Pr \left( \sup_{t \in \mathcal{T}, 1 \leq k \leq L(\epsilon), \eta_{k-1}^{(j)} < x < \eta_k^{(j)}} \max_{1 \leq i \leq n} n \left[ 1\{Y_i \leq t\} \log \left( \frac{V_{ji}(x)}{V_{ji}(\eta_{k-1}^{(j)})} \right) \right] > \frac{8\epsilon}{\lambda^2} \right) \\
& \leq Pr \left( \sup_{t \in \mathcal{T}, 1 \leq k \leq L(\epsilon), \eta_{k-1}^{(j)} < x < \eta_k^{(j)}} \max_{1 \leq i \leq n} 2n \left[ 1\{Y_i \leq t\} \right. \right. \\
& \quad \left. \left. \times \frac{\sum_{l=1}^n 1\{Y_l > Y_i, \eta_{k-1}^{(j)} < X_{jl} < x\}}{\left( \sum_{l=1}^n 1\{Y_l > Y_i, X_{jl} > x\} \right) \left( \sum_{l=1}^n 1\{Y_l > Y_i, X_{jl} > \eta_{k-1}^{(j)}\} \right)} \right] > \frac{8\epsilon}{\lambda^2} \right) \\
& \leq Pr \left( \sup_{1 \leq k \leq L(\epsilon)} 2n \frac{\sum_{l=1}^n 1\{\eta_{k-1}^{(j)} < X_{jl} < \eta_k^{(j)}\}}{\left( \sum_{l=1}^n 1\{Y_l > t_0, X_{jl} > x_0\} \right)^2} > \frac{8\epsilon}{\lambda^2} \right) \\
& \leq Pr \left( \sup_{1 \leq k \leq L(\epsilon)} \left| \hat{S}_j(\eta_{k-1}^{(j)}) - \hat{S}_j(\eta_k^{(j)}) \right| > \epsilon \right) + Pr \left( \frac{2n^2}{\left( \sum_{l=1}^n 1\{Y_l > t_0, X_{jl} > x_0\} \right)^2} > \frac{8}{\lambda^2} \right) \\
& \leq 12 \exp(-n\epsilon^2/9 - \log \epsilon) + 2 \exp(-n\lambda^2/16),
\end{aligned}$$

where the last inequality follows from (2) and the proof of Lemma 3. This completes the proof of Lemma 4.  $\square$

### A useful result

By Foldes and Rejto (1981), for some universal constants  $c_1$  and  $c_2$ , and  $12/(n\gamma^4) < \epsilon < 1$ .

$$Pr \left( \sup_{t \in \mathcal{T}} |\hat{S}(t) - S(t)| > \epsilon \right) \leq c_1 \exp(-n\gamma^6 \epsilon^2 / c_2 - \log \epsilon), \quad (8)$$

### Hadamard differentiability of $\int_{\Omega^c(\kappa_j)} W_\xi(t, x) \cdot |dtdx$

For any convergent sequences  $u_n \rightarrow 0$  there exists an  $N$ , such that for all  $n > N$ ,  $|u_n h_n(t; x)| \leq \kappa_j$  uniformly in  $\mathcal{T} \times \mathcal{X}$ . Then for  $n > N$ ,

$$\begin{aligned}
& \int_{\Omega^c(\kappa_j)} W_\xi(t, x) |S_j(t; x) - S(t) + u_n h_n(t, x)| dtdx - \int_{\Omega^c(\kappa_j)} W_\xi(t, x) |S_j(t; x) - S(t)| dtdx \\
&= \int_{\Omega^c(\kappa_j)} W_\xi(t, x) \operatorname{sgn}(S_j(t; x) - S(t)) [S_j(t; x) - S(t) + u_n h_n(t, x)] dtdx \\
&\quad - \int_{\Omega^c(\kappa_j)} W_\xi(t, x) \operatorname{sgn}(S_j(t; x) - S(t)) [S_j(t; x) - S(t)] dtdx \\
&= \int_{\Omega^c(\kappa_j)} W_\xi(t, x) \operatorname{sgn}(S_j(t; x) - S(t)) u_n h_n(t, x) dtdx.
\end{aligned}$$

Thus, we have

$$\begin{aligned}
& \lim_{n \rightarrow \infty} u_n^{-1} \left( \int_{\Omega^c(\kappa_j)} W_\xi(t, x) |S_j(t; x) - S(t) + u_n h_n(t, x)| dtdx \right. \\
&\quad \left. - \int_{\Omega^c(\kappa_j)} W_\xi(t, x) |S_j(t; x) - S(t)| dtdx \right) \\
&= \int_{\Omega^c(\kappa_j)} W_\xi(t, x) \operatorname{sgn}(S_j(t; x) - S(t)) h(t, x) dtdx,
\end{aligned}$$

which implies  $\int_{\Omega^c(\kappa_j)} W_\xi(t, x) \cdot |dtdx$  is Hadamard-differentiable at  $S_j(\cdot; \cdot) - S(\cdot)$ .

### Detailed arguments of Theorem 2

**Step 1:** We consider  $\sup_{t \in \mathcal{T}, 0 \leq k \leq L(\epsilon)} \left| \hat{S}_j(t; \eta_k^{(j)}) - S_j(t; \eta_k^{(j)}) \right|$  first. By Lemma 2, we obtain that for any  $24/(n\tau\gamma^4) < \epsilon < \tau/2$ ,

$$\begin{aligned}
& Pr \left( \sup_{t \in \mathcal{T}, 0 \leq k \leq L(\epsilon)} \left| \hat{S}_j(t; \eta_k^{(j)}) - S_j(t; \eta_k^{(j)}) \right| > \epsilon \right) \\
&\leq L(\epsilon) Pr \left( \sup_{t \in \mathcal{T}} \left| \hat{S}_j(t; \eta_k^{(j)}) - S_j(t; \eta_k^{(j)}) \right| > \epsilon \right) \\
&\leq 72 \exp(-n\epsilon^2/9 - 2 \log \epsilon) + 6c_1 \exp(-n\tau\gamma^6 \epsilon^2 / (2c_2) - 2 \log \epsilon). \tag{9}
\end{aligned}$$

**Step 2:** Next, we consider  $\sup_{t \in \mathcal{T}, 1 \leq k \leq L(\epsilon), \eta_{k-1}^{(j)} < x < \eta_k^{(j)}} |S_j(t; x) - S_j(t; \eta_{k-1}^{(j)})|$ . If  $\eta_{k-1}^{(j)} < x < \eta_k^{(j)}$ ,

$$\begin{aligned} |S_j(t; x) - S_j(t; \eta_{k-1}^{(j)})| &= \left| \frac{\Pr(T > t, X_j > x)}{\Pr(X_j > x)} - \frac{\Pr(T > t, X_j > \eta_{k-1}^{(j)})}{\Pr(X_j > \eta_{k-1}^{(j)})} \right| \\ &\leq \frac{\Pr(T > t, X_j > x) \left| \Pr(X_j > \eta_{k-1}^{(j)}) - \Pr(X_j > x) \right|}{\Pr(X_j > x) \Pr(X_j > \eta_{k-1}^{(j)})} \\ &\quad + \frac{\Pr(X_j > x) \left| \Pr(T > t, X_j > x) - \Pr(T > t, X_j > \eta_{k-1}^{(j)}) \right|}{\Pr(X_j > x) \Pr(X_j > \eta_{k-1}^{(j)})} \\ &\leq \frac{\epsilon/3}{\tau} + \frac{\epsilon/3}{\tau} = \frac{2\epsilon}{3\tau}. \end{aligned}$$

Therefore, we obtain

$$\sup_{t \in \mathcal{T}, 1 \leq k \leq L(\epsilon), \eta_{k-1}^{(j)} < x < \eta_k^{(j)}} |S_j(t; x) - S_j(t; \eta_{k-1}^{(j)})| < \frac{2\epsilon}{3\tau}. \quad (10)$$

**Step 3:** Then we deal with  $\sup_{t \in \mathcal{T}, 1 \leq k \leq L(\epsilon), \eta_{k-1}^{(j)} < x < \eta_k^{(j)}} |\hat{S}_j(t; x) - \hat{S}_j(t; \eta_{k-1}^{(j)})|$ . For any  $0 < u, v \leq 1$ , we have  $|u - v| \leq |\log u - \log v|$ . Therefore,

$$\begin{aligned} &\Pr \left( \sup_{t \in \mathcal{T}, 1 \leq k \leq L(\epsilon), \eta_{k-1}^{(j)} < x < \eta_k^{(j)}} |\hat{S}_j(t; x) - \hat{S}_j(t; \eta_{k-1}^{(j)})| > \frac{4\epsilon}{\lambda} + \frac{8\epsilon}{\lambda^2} \right) \\ &\leq \Pr \left( \sup_{t \in \mathcal{T}, 1 \leq k \leq L(\epsilon), \eta_{k-1}^{(j)} < x < \eta_k^{(j)}} \left| \log \hat{S}_j(t; x) - \log \hat{S}_j(t; \eta_{k-1}^{(j)}) \right| > \frac{4\epsilon}{\lambda} + \frac{8\epsilon}{\lambda^2} \right) \\ &\leq \Pr \left( \sup_{t \in \mathcal{T}, 1 \leq k \leq L(\epsilon), \eta_{k-1}^{(j)} < x < \eta_k^{(j)}} \left| \sum_{i=1}^n \log V_{ji}(x) \right. \right. \\ &\quad \left. \left. \times \left( 1 \{ \delta_i = 1, Y_i \leq t, X_{ji} > x \} - 1 \{ \delta_i = 1, Y_i \leq t, X_{ji} > \eta_{k-1}^{(j)} \} \right) \right| > \frac{4\epsilon}{\lambda} \right) \\ &+ \Pr \left( \sup_{t \in \mathcal{T}, 1 \leq k \leq L(\epsilon), \eta_{k-1}^{(j)} < x < \eta_k^{(j)}} \sum_{i=1}^n 1 \{ \delta_i = 1, Y_i \leq t, X_{ji} > \eta_{k-1}^{(j)} \} \right. \\ &\quad \left. \times \log \left( \frac{V_{ji}(x)}{V_{ji}(\eta_{k-1}^{(j)})} \right) > \frac{8\epsilon}{\lambda^2} \right) \end{aligned}$$



where the last inequality follows from the decomposition:

$$\begin{aligned} & \log \hat{S}_j(t; x) - \log \hat{S}_j(t; \eta_{k-1}^{(j)}) \\ &= \sum_{i=1}^n \left[ 1 \{ \delta_i = 1, Y_i \leq t, X_{ji} > x \} - 1 \{ \delta_i = 1, Y_i \leq t, X_{ji} > \eta_{k-1}^{(j)} \} \right] \log V_{ji}(x) \\ &+ \sum_{i=1}^n 1 \{ \delta_i = 1, Y_i \leq t, X_{ji} > \eta_{k-1}^{(j)} \} \left[ \log V_{ji}(x) - \log V_{ji}(\eta_{k-1}^{(j)}) \right]. \end{aligned}$$

Then we have,

$$\begin{aligned} & Pr \left( \sup_{t \in \mathcal{T}, 1 \leq k \leq L(\epsilon), \eta_{k-1}^{(j)} < x < \eta_k^{(j)}} \left| \sum_{i=1}^n \log V_{ji}(x) \right. \right. \\ & \quad \left. \left. \times \left( 1 \{ \delta_i = 1, Y_i \leq t, X_{ji} > x \} - 1 \{ \delta_i = 1, Y_i \leq t, X_{ji} > \eta_{k-1}^{(j)} \} \right) \right| > \frac{4\epsilon}{\lambda} \right) \\ & \leq Pr \left( \sup_{(t,x) \in \mathcal{T} \times \mathcal{X}} \max_{1 \leq i \leq n} |1 \{ Y_i \leq t \} n \log V_{ji}(x)| \right. \\ & \quad \left. \times \sup_{t \in \mathcal{T}, 1 \leq k \leq L(\epsilon)} \frac{\sum_{i=1}^n 1 \{ \delta_i = 1, Y_i \leq t, \eta_{k-1}^{(j)} < X_{ji} < \eta_k^{(j)} \}}{n} > \frac{4\epsilon}{\lambda} \right) \\ & \leq Pr \left( \sup_{(t,x) \in \mathcal{T} \times \mathcal{X}} \max_{1 \leq i \leq n} |1 \{ Y_i \leq t \} n \log V_{ji}(x)| \sup_{1 \leq k \leq L(\epsilon)} \left[ \hat{S}_j(\eta_{k-1}^{(j)}) - \hat{S}_j(\eta_k^{(j)}) \right] > \frac{4\epsilon}{\lambda} \right) \\ & \leq Pr \left( \sup_{(t,x) \in \mathcal{T} \times \mathcal{X}} \max_{1 \leq i \leq n} |1 \{ Y_i \leq t \} n \log V_{ji}(x)| > \frac{4}{\lambda} \right) \\ & + Pr \left( \sup_{t \in \mathcal{T}, 1 \leq k \leq L(\epsilon)} \left[ \hat{S}_j(\eta_{k-1}^{(j)}) - \hat{S}_j(\eta_k^{(j)}) \right] > \epsilon \right) \\ & \leq 2 \exp(-n\lambda^2/16) + 12 \exp(-n\epsilon^2/9 - \log \epsilon), \end{aligned}$$

following from Lemma 3 and (2). On the other hand, by Lemma 4.

$$\begin{aligned} & Pr \left( \sup_{t \in \mathcal{T}, 1 \leq k \leq L(\epsilon), \eta_{k-1}^{(j)} < x < \eta_k^{(j)}} \sum_{i=1}^n 1 \{ \delta_i = 1, Y_i \leq t, X_{ji} > \eta_{k-1}^{(j)} \} \right. \\ & \quad \left. \times \log \left( \frac{V_{ji}(x)}{V_{ji}(\eta_{k-1}^{(j)})} \right) > \frac{8\epsilon}{\lambda^2} \right) \\ & \leq Pr \left( \sup_{t \in \mathcal{T}, 1 \leq k \leq L(\epsilon), \eta_{k-1}^{(j)} < x < \eta_k^{(j)}} \max_{1 \leq i \leq n} n \left[ 1 \{ Y_i \leq t \} \log \left( \frac{V_{ji}(x)}{V_{ji}(\eta_{k-1}^{(j)})} \right) \right] > \frac{8\epsilon}{\lambda^2} \right) \\ & \leq 12 \exp(-n\epsilon^2/9 - \log \epsilon) + 2 \exp(-n\lambda^2/16). \end{aligned}$$

Thus,

$$\begin{aligned} & Pr \left( \sup_{t \in \mathcal{T}, 1 \leq k \leq L(\epsilon), \eta_{k-1}^{(j)} < x < \eta_k^{(j)}} \left| \hat{S}_j(t; x) - \hat{S}_j \left( t; \eta_{k-1}^{(j)} \right) \right| > \frac{4\epsilon}{\lambda} + \frac{8\epsilon}{\lambda^2} \right) \\ & \leq 24 \exp(-n\epsilon^2/9 - \log \epsilon) + 4 \exp(-n\lambda^2/16). \end{aligned} \quad (11)$$

Combining (9), (10) and (11) yields,

$$\begin{aligned} & Pr \left( \sup_{t \in \mathcal{T}, 0 \leq x \leq x_0} |\hat{S}_j(t; x) - S_j(t; x)| > \epsilon + \frac{2\epsilon}{3\lambda} + \frac{4\epsilon}{\lambda} + \frac{8\epsilon}{\lambda^2} \right) \\ & \leq 72 \exp(-n\epsilon^2/9 - 2 \log \epsilon) + 6c_1 \exp(-n\tau\delta^6\epsilon^2/(2c_2) - 2 \log \epsilon) \\ & \quad + 24 \exp(-n\epsilon^2/9 - \log \epsilon) + 4 \exp(-n\lambda^2/16), \end{aligned} \quad (12)$$

for any  $24/(n\tau\gamma^4) < \epsilon < \lambda \wedge \tau/2$ . This and (8) together imply

$$\begin{aligned} & Pr \left( \sup_{t \in \mathcal{T}, 0 \leq x \leq x_0} \left| \hat{S}_j(t; x) - \hat{S}(t) - (S_j(t; x) - S(t)) \right| > \epsilon \right) \\ & \leq c_3 \exp(-nc_4\epsilon^2 - c_5 \log \epsilon), \end{aligned} \quad (13)$$

for any  $c_6 n^{-1} < \epsilon < 1$ , where  $c_3, c_4, c_5, c_6$  are some constant depending only on  $\tau, \gamma$ , and  $\lambda$ , and  $n$  is sufficiently large.

Since

$$|\hat{\xi}_j - \xi_j| \leq \int_0^{x_0} \int_0^{t_0} W_\xi(t, x) \left| \hat{S}_j(t; x) - \hat{S}(t) - S_j(t; x) + S(t) \right| dt dx,$$

then by (13),

$$\begin{aligned} & Pr \left( |\hat{\xi}_j - \xi_j| > \epsilon \right) \\ & \leq Pr \left( \int_0^{x_0} \int_0^{t_0} W_\xi(t, x) \left| \hat{S}_j(t; x) - \hat{S}(t) - S_j(t; x) + S(t) \right| dt dx > \epsilon \right) \\ & \leq Pr \left( \sup_{t \in \mathcal{T}, 0 \leq x \leq x_0} \left| \hat{S}_j(t; x) - \hat{S}(t) - (S_j(t; x) - S(t)) \right| > \epsilon \right) \\ & \leq c_3 \exp(-nc_4\epsilon^2 - c_5 \log \epsilon). \end{aligned} \quad (14)$$

and hence

$$Pr \left( \max_{1 \leq j \leq p} |\hat{\xi}_j - \xi_j| > \epsilon \right) \leq c_3 \exp(-nc_4\epsilon^2 - c_5 \log \epsilon + \log p). \quad (15)$$

**References**

- Foldes, A. and Rejto, L. (1981). Strong uniform consistency for nonparametric survival curve estimators from randomly censored data. *Annals of Statistics* **9**, 122–129.
